# Supplementary material
Source: publisher figshare collection journal article supplement (https://tandf.figshare.com/ndownloader/files/21602055)
Supplement: Supplementary file 1 [file 21602055]

**Supplementary Material**

**Supplementary Figure 1. Flow Diagram of Patient Selection**


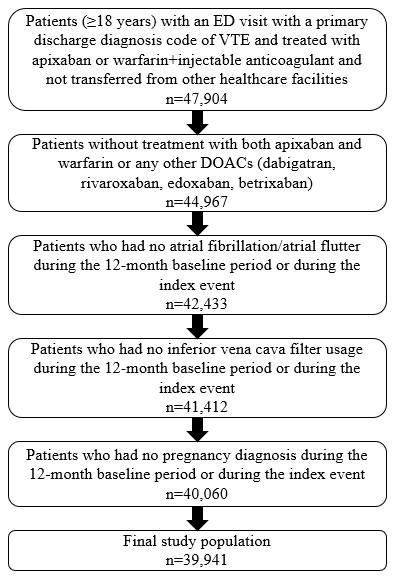


**Supplementary Table 1A. Demographics and Clinical Characteristics of Study Cohorts with an Index ED Visit Only**

| **Characteristic** | **Apixaban**  **n=8,395** | | **Warfarin**  **n=9,147** | | **p-value** |
| --- | --- | --- | --- | --- | --- |
| **Age (years)** |  |  |  |  | <0.001 |
| Mean (SD) | 58.7 (16.9) | | 57.0 (16.8) | |
| Median | 59 | | 57 | |  |
| **Age Group, N, %** |  |  |  |  | <0.001 |
| 18-34 years | 770 | 9.2% | 988 | 10.8% |  |
| 35-44 years | 1,056 | 12.6% | 1,251 | 13.7% |  |
| 45-54 years | 1,535 | 18.3% | 1,806 | 19.7% |  |
| 55-64 years | 1,760 | 21.0% | 1,925 | 21.1% |  |
| 65-74 years | 1,623 | 19.3% | 1,638 | 17.9% |  |
| ≥75 years | 1,651 | 19.7% | 1,539 | 16.8% |  |
| **Gender, N, %** |  |  |  |  | <0.001 |
| Female | 4,176 | 49.7% | 4,295 | 47.0% |  |
| Male | 4,219 | 50.3% | 4,852 | 53.0% |  |
| **Race, N, %** |  |  |  |  | <0.001 |
| White | 6,494 | 77.4% | 7,156 | 78.2% |  |
| Black | 1,201 | 14.3% | 918 | 10.0% |  |
| Other/Missing | 700 | 8.3% | 1,073 | 11.7% |  |
| **Payer Type, N, %** |  |  |  |  | <0.001 |
| Commercial | 3,173 | 37.8% | 3,105 | 34.0% |  |
| Medicare | 3,409 | 40.6% | 3,401 | 37.2% |  |
| Medicaid | 903 | 10.8% | 1,622 | 17.7% |  |
| Others | 910 | 10.8% | 1,019 | 11.1% |  |
| **CCI Score** |  |  |  |  | 0.017 |
| Mean (SD) | 0.7 (1.4) | | 0.6 (1.3) | |
| Median | 0 | | 0 | |  |
| **CCI Score Group, N, %** |  |  |  |  | 0.065 |
| CCI=0 | 5,757 | 68.6% | 6,311 | 69.0% |  |
| CCI=1-2 | 2,040 | 24.3% | 2,271 | 24.8% |  |
| CCI=3-4 | 355 | 4.2% | 349 | 3.8% |  |
| CCI≥5 | 243 | 2.9% | 216 | 2.4% |  |
| **Comorbidities at Index Event, N, %** |  |  |  |  |  |
| Hypertension | 2,985 | 35.6% | 3,006 | 32.9% | <0.001 |
| Diabetes | 1,136 | 13.5% | 1,231 | 13.5% | 0.886 |
| Peripheral Vascular Disease | 564 | 6.7% | 540 | 5.9% | 0.026 |
| Coronary Artery Disease | 475 | 5.7% | 453 | 5.0% | 0.037 |
| Cancer/Malignancy | 240 | 2.9% | 247 | 2.7% | 0.523 |
| Congestive Heart Failure | 180 | 2.1% | 199 | 2.2% | 0.886 |
| Myocardial Infarction | 192 | 2.3% | 194 | 2.1% | 0.454 |
| Pneumonia | 36 | 0.4% | 33 | 0.4% | 0.472 |
| Rheumatic Disease | 76 | 0.9% | 76 | 0.8% | 0.595 |
| Inflammatory Bowel Disease | 24 | 0.3% | 31 | 0.3% | 0.530 |
| **Prior VTE Diagnosis in the Baseline Period, N, %** | 790 | 9.4% | 1,089 | 11.9% | <0.001 |
| **Prior Any Bleeding Diagnosis in the Baseline Period, N, %** | 95 | 1.1% | 106 | 1.2% | 0.866 |

Patient demographics and clinical characteristics were evaluated during the index event; prior VTE and any bleeding diagnoses were measured during the 12-month baseline period.

SD: Standard deviation; CCI: Charlson Comorbidity Index; VTE: Venous thromboembolism

**Supplementary Table 1B. Index Event and Hospital Characteristics of Study Cohorts with an Index ED Visit Only**

| **Characteristic** | **Apixaban**  **n=8,395** | | **Warfarin**  **n=9,147** | | **p-value** |
| --- | --- | --- | --- | --- | --- |
| **Primary Diagnosis VTE Type, N, %** |  |  |  |  | <0.001 |
| DVT | 7,492 | 89.2% | 8,440 | 92.3% |  |
| PE | 903 | 10.8% | 707 | 7.7% |  |
| **Index Event Hospital Cost** |  | |  | | <0.001 |
| Mean (SD) | $647 ($639) | | $793 ($720) | |  |
| Median | $490 | | $615 | |  |
| **Hospital Region, N, %** |  |  |  |  | <0.001 |
| East North Central | 1,343 | 16.0% | 1,117 | 12.2% |  |
| East South Central | 770 | 9.2% | 298 | 3.3% |  |
| Middle Atlantic | 740 | 8.8% | 419 | 4.6% |  |
| Mountain | 298 | 3.6% | 1,010 | 11.0% |  |
| New England | 275 | 3.3% | 522 | 5.7% |  |
| Pacific | 1,090 | 13.0% | 3,594 | 39.3% |  |
| South Atlantic | 3,016 | 35.9% | 1,396 | 15.3% |  |
| West North Central | 334 | 4.0% | 504 | 5.5% |  |
| West South Central | 529 | 6.3% | 287 | 3.1% |  |
| **Location, N, %** |  |  |  |  | 0.324 |
| Urban | 7,238 | 86.2% | 7,933 | 86.7% |  |
| Rural | 1,157 | 13.8% | 1,214 | 13.3% |  |
| **Teaching Status, N, %** |  |  |  |  | <0.001 |
| No | 5,612 | 66.9% | 6,396 | 69.9% |  |
| Yes | 2,783 | 33.2% | 2,751 | 30.1% |  |
| **Hospital Bed Size, N, %** |  |  |  |  | <0.001 |
| 0-99 | 673 | 8.0% | 1,096 | 12.0% |  |
| 100-199 | 1,530 | 18.2% | 1,597 | 17.5% |  |
| 200-299 | 1,868 | 22.3% | 1,872 | 20.5% |  |
| 300-399 | 1,555 | 18.5% | 1,500 | 16.4% |  |
| 400-499 | 908 | 10.8% | 1,239 | 13.6% |  |
| ≥500 | 1,861 | 22.2% | 1,843 | 20.2% |  |

Index event and hospital characteristics were evaluated during the index event.

DVT: Deep vein thrombosis; PE: Pulmonary embolism.

**Supplementary Table 1C. Unadjusted Rates of Readmissions* Within 1 Month of Index Event of Study Cohorts with an Index ED Visit Only**

| **Readmissions** | **Apixaban** | **Warfarin** | **p-value** |
| --- | --- | --- | --- |
| All-cause | 11.0% | 14.6% | <0.001 |
| MB-related | 0.6% | 0.7% | 0.405 |
| VTE-related | 6.0% | 7.9% | <0.001 |

ED; Emergency department; MB; Major bleeding; VTE: Venous thromboembolism

*Readmissions included ED visits and inpatient admissions.

**Supplementary Table 2A. Demographics and Clinical Characteristics of Study Cohorts of Patients Admitted to the Inpatient Setting**

| **Characteristic** | **Apixaban**  **n=3,779** | | **Warfarin**  **n=18,620** | | **p-value** |
| --- | --- | --- | --- | --- | --- |
| **Age (years)** |  |  |  |  | <0.001 |
| Mean (SD) | 62.1 (17.0) | | 60.4 (17.2) | |
| Median | 64 | | 61 | |  |
| **Age Group, N, %** |  |  |  |  | <0.001 |
| 18-34 years | 283 | 7.5% | 1,602 | 8.6% |  |
| 35-44 years | 357 | 9.5% | 2,035 | 10.9% |  |
| 45-54 years | 550 | 14.6% | 3,124 | 16.8% |  |
| 55-64 years | 752 | 19.9% | 3,842 | 20.6% |  |
| 65-74 years | 845 | 22.4% | 3,553 | 19.1% |  |
| ≥75 years | 992 | 26.3% | 4,464 | 24.0% |  |
| **Gender, N, %** |  |  |  |  | 0.195 |
| Female | 1,963 | 51.9% | 9,457 | 50.8% |  |
| Male | 1,816 | 48.1% | 9,163 | 49.2% |  |
| **Race, N, %** |  |  |  |  | <0.001 |
| White | 2,891 | 76.5% | 13,738 | 73.8% |  |
| Black | 634 | 16.8% | 3,204 | 17.2% |  |
| Other/Missing | 254 | 6.7% | 1,678 | 9.0% |  |
| **Payer Type, N, %** |  |  |  |  | <0.001 |
| Commercial | 1,086 | 28.7% | 4,711 | 25.3% |  |
| Medicare | 2,038 | 53.9% | 9,071 | 48.7% |  |
| Medicaid | 408 | 10.8% | 2,796 | 15.0% |  |
| Others | 247 | 6.5% | 2,042 | 11.0% |  |
| **CCI Score** |  |  |  |  | 0.001 |
| Mean (SD) | 1.8 (2.3) | | 1.7 (2.1) | |
| Median | 1 | | 1 | |  |
| **CCI Score Group, N, %** |  |  |  |  | 0.014 |
| CCI=0 | 1,398 | 37.0% | 7,059 | 37.9% |  |
| CCI=1-2 | 1,428 | 37.8% | 7,210 | 38.7% |  |
| CCI=3-4 | 537 | 14.2% | 2,612 | 14.0% |  |
| CCI≥5 | 416 | 11.0% | 1,739 | 9.3% |  |
| **Comorbidities at Index Event, N, %** |  |  |  |  |  |
| Hypertension | 2,355 | 62.3% | 11,062 | 59.4% | <0.001 |
| Diabetes | 879 | 23.3% | 4,321 | 23.2% | 0.943 |
| Peripheral Vascular Disease | 769 | 20.4% | 3,427 | 18.4% | 0.005 |
| Coronary Artery Disease | 692 | 18.3% | 2,998 | 16.1% | <0.001 |
| Cancer/Malignancy | 341 | 9.0% | 1,456 | 7.8% | 0.013 |
| Congestive Heart Failure | 368 | 9.7% | 1,695 | 9.1% | 0.218 |
| Myocardial Infarction | 237 | 6.3% | 978 | 5.3% | 0.012 |
| Pneumonia | 294 | 7.8% | 940 | 5.1% | <0.001 |
| Rheumatic Disease | 104 | 2.8% | 559 | 3.0% | 0.408 |
| Inflammatory Bowel Disease | 43 | 1.1% | 219 | 1.2% | 0.842 |
| **Prior VTE Diagnosis in the Baseline Period, N, %** | 425 | 11.3% | 2,181 | 11.7% | 0.414 |
| **Prior Any Bleeding Diagnosis in the Baseline Period, N, %** | 70 | 1.9% | 354 | 1.9% | 0.841 |

Patient demographics and clinical characteristics were evaluated during the index event; prior VTE and any bleeding diagnoses were measured during the 12-month baseline period.

SD: Standard deviation; CCI: Charlson Comorbidity Index; VTE: Venous thromboembolism

**Supplementary Table 2B. Index Event and Hospital Characteristics of Study Cohorts of Patients Admitted to the Inpatient Setting**

| **Characteristic** | **Apixaban**  **n=3,779** | | **Warfarin**  **n=18,620** | | **p-value** |
| --- | --- | --- | --- | --- | --- |
| **Primary Diagnosis VTE Type, N, %** |  |  |  |  | <0.001 |
| DVT | 1,317 | 34.9% | 7,526 | 40.4% |  |
| PE | 2,462 | 65.2% | 11,094 | 59.6% |  |
| **Hospital Length of Stay** |  | |  | | <0.001 |
| Mean (SD) | 2.87 (2.52) | | 3.83 (2.93) | |  |
| Median | 2 | | 3 | |  |
| **Hospital Length of Stay, N, %** |  |  |  |  | <0.001 |
| 1-2 Days | 2,221 | 58.8% | 6,930 | 37.2% |  |
| 3-4 Days | 948 | 25.1% | 5,919 | 31.8% |  |
| 5-6 Days | 330 | 8.7% | 3,462 | 18.6% |  |
| ≥7 Days | 280 | 7.4% | 2,309 | 12.4% |  |
| **Index Event Hospital Cost** |  | |  | | <0.001 |
| Mean (SD) | $6,257 ($6,348) | | $7,586 ($6,782) | |  |
| Median | $4,515 | | $6,010 | |  |
| **Hospital Region, N, %** |  |  |  |  | <0.001 |
| East North Central | 608 | 16.1% | 3,518 | 18.9% |  |
| East South Central | 289 | 7.7% | 1,016 | 5.5% |  |
| Middle Atlantic | 737 | 19.5% | 1,969 | 10.6% |  |
| Mountain | 81 | 2.1% | 1,414 | 7.6% |  |
| New England | 61 | 1.6% | 628 | 3.4% |  |
| Pacific | 303 | 8.0% | 3,021 | 16.2% |  |
| South Atlantic | 1,174 | 31.1% | 4,181 | 22.5% |  |
| West North Central | 146 | 3.9% | 1,543 | 8.3% |  |
| West South Central | 380 | 10.1% | 1,330 | 7.1% |  |
| **Location, N, %** |  |  |  |  | 0.394 |
| Urban | 3,257 | 86.2% | 15,949 | 85.7% |  |
| Rural | 522 | 13.8% | 2,671 | 14.3% |  |
| **Teaching Status, N, %** |  |  |  |  | 0.033 |
| No | 2,406 | 63.7% | 11,512 | 61.8% |  |
| Yes | 1,373 | 36.3% | 7,108 | 38.2% |  |
| **Hospital Bed Size, N, %** |  |  |  |  | <0.001 |
| 0-99 | 230 | 6.1% | 1,473 | 7.9% |  |
| 100-199 | 679 | 18.0% | 3,254 | 17.5% |  |
| 200-299 | 816 | 21.6% | 3,827 | 20.6% |  |
| 300-399 | 620 | 16.4% | 3,185 | 17.1% |  |
| 400-499 | 374 | 9.9% | 2,404 | 12.9% |  |
| ≥500 | 1,060 | 28.1% | 4,477 | 24.0% |  |

Index event and hospital characteristics were evaluated during the index event.

DVT: Deep vein thrombosis; PE: Pulmonary embolism.

**Supplementary Table 2C. Unadjusted Rates of Readmissions* Within 1 Month of Index Event of Study Cohorts of Patients Admitted to the Inpatient Setting**

| **Readmissions** | **Apixaban** | **Warfarin** | **p-value** |
| --- | --- | --- | --- |
| All-cause | 8.8% | 11.3% | <0.001 |
| MB-related | 0.4% | 0.7% | 0.017 |
| VTE-related | 3.3% | 4.4% | 0.003 |

ED; Emergency department; MB; Major bleeding; VTE: Venous thromboembolism

*Readmissions included ED visits and inpatient admissions.

**Supplementary Table 3. Diagnosis Codes for VTE**

| **VTE Type** | **Code** | **Description** | **ICD Version** |
| --- | --- | --- | --- |
| DVT | 451 | Thrombophlebitis | 9 |
| DVT | 451.1 | Deep Phlebitis-Leg | 9 |
| DVT | 451.11 | Phlebitis, Femoral Vein | 9 |
| DVT | 451.19 | Phlebitis, Deep Veins, Lwr Limb NOS | 9 |
| DVT | 451.2 | Phlebitis, Lower Limb NOS | 9 |
| DVT | 451.8 | Thrombophlebitis NEC | 9 |
| DVT | 451.81 | Phlebitis, Iliac Vein | 9 |
| DVT | 451.83 | Phlebitis, Deep Veins, Upper Limb | 9 |
| DVT | 451.84 | Phlebitis, Upper Limb NOS | 9 |
| DVT | 451.9 | Thrombophlebitis NOS | 9 |
| DVT | 453 | Oth Venous Thrombosis | 9 |
| DVT | 453.1 | Thrombophlebitis Migrans | 9 |
| DVT | 453.2 | Thrombosis, Inferior Vena Cava | 9 |
| DVT | 453.40 | Acute Emblsm/Thrmb Dp Vsl Lwr Extrm | 9 |
| DVT | 453.41 | Acute Embl/Thrmb Dp Vsl Lwr Ext Prx | 9 |
| DVT | 453.42 | Acute Emb/Thrb Dp Vsl Lwr Ext Dst | 9 |
| DVT | 453.6 | Venous Embl Thrmb Supfcl Lowr Ext | 9 |
| DVT | 453.8 | Thrombosis, Venous NEC | 9 |
| DVT | 453.81 | Acute Ven Emb Thrmb Sup Ven Upp Ext | 9 |
| DVT | 453.82 | Acute Ven Emb Thrmb Dep Ven Upp Ext | 9 |
| DVT | 453.83 | Acute Ven Emb Thrmb Upp Ext Unspec | 9 |
| DVT | 453.84 | Acute Ven Emb Thrmb Axilary Veins | 9 |
| DVT | 453.85 | Acute Ven Emb Thrmb Subclav Veins | 9 |
| DVT | 453.86 | Acute Ven Emb Thrmb Intrl Jug Veins | 9 |
| DVT | 453.87 | Acute Ven Emb Thrmb Otr Thorc Veins | 9 |
| DVT | 453.89 | Acute Ven Emb Thrmb Otr Spec Veins | 9 |
| DVT | 453.9 | Thrombosis, Venous NOS | 9 |
| DVT | I80.1 | Phlebitis & Thrombo of Femoral Vein | 10 |
| DVT | I80.10 | Phlebitis & Thrombo, Uns Femoral Vein | 10 |
| DVT | I80.11 | Phlebitis & Thrombo, Rt Femoral Vein | 10 |
| DVT | I80.12 | Phlebitis & Thrombo, Lft Femoral Vein | 10 |
| DVT | I80.13 | Phlebitis & Thrombo, Femoral Vein, Bil | 10 |
| DVT | I80.2 | Phlebts, Oth Uns Deep Vssl, Lwr Extrm | 10 |
| DVT | I80.20 | Phlebitis, Uns Deep Vessls, Lwr Extrm | 10 |
| DVT | I80.201 | Phlebitis, Uns Deep Vsl, Rt Lwr Extrm | 10 |
| DVT | I80.202 | Phlebitis, Uns Deep Vsl, Lt Lwr Extrm | 10 |
| DVT | I80.203 | Phlebits, Uns Deep Vsl, Lwr Extrm, Bil | 10 |
| DVT | I80.209 | Phlebits, Uns Deep Vsl, Uns Lwr Extrm | 10 |
| DVT | I80.21 | Phlebitis & Thrombophlebit, Iliac Vein | 10 |
| DVT | I80.211 | Phlebitis & Thrombophle, Rt Iliac Vein | 10 |
| DVT | I80.212 | Phlebitis & Thrombophle, Lt Iliac Vein | 10 |
| DVT | I80.213 | Phlebitis & Thrombophl, Iliac Vein, Bil | 10 |
| DVT | I80.219 | Phlebitis & Thrombophl, Uns Iliac Vein | 10 |
| DVT | I80.22 | Phlebitis & Thrombophl, Popliteal Vein | 10 |
| DVT | I80.221 | Phlebitis & Thrombo, Rt Popliteal Vein | 10 |
| DVT | I80.222 | Phlebitis & Thrombo, Lt Popliteal Vein | 10 |
| DVT | I80.223 | Phlebitis & Thrombo, Poplitl Vein, Bil | 10 |
| DVT | I80.229 | Phlebitis & Thrombo, Uns Poplitel Vein | 10 |
| DVT | I80.23 | Phlebitis & Thrombophleb, Tibial Vein | 10 |
| DVT | I80.231 | Phlebitis & Thrombophl, Rt Tibial Vein | 10 |
| DVT | I80.232 | Phlebitis & Thrombophl, Lt Tibial Vein | 10 |
| DVT | I80.233 | Phlebitis & Thromboph, Tibial Vein, Bil | 10 |
| DVT | I80.239 | Phlebitis & Thromboph, Uns Tibial Vein | 10 |
| DVT | I80.29 | Phlebitis, Oth Deep Vessls, Lwr Extrm | 10 |
| DVT | I80.291 | Phlebitis, Oth Deep Vsl, Rt Lwr Extrm | 10 |
| DVT | I80.292 | Phlebitis, Oth Deep Vsl, Lt Lwr Extrm | 10 |
| DVT | I80.293 | Phlebits, Oth Deep Vsl, Lwr Extrm, Bil | 10 |
| DVT | I80.299 | Phlebits, Oth Deep Vsl, Uns Lwr Extrm | 10 |
| DVT | I80.3 | Phlebitis & Thrombo, Lwr Extrm, Uns | 10 |
| DVT | I80.9 | Phlebitis & Thrombophlebitis, Uns Site | 10 |
| DVT | I82.1 | Thrombophlebitis Migrans | 10 |
| DVT | I82.210 | Acute Emblsm & Thrmb, Super Vena Cava | 10 |
| DVT | I82.220 | Acute Emblsm & Thrmb, Infer Vena Cava | 10 |
| DVT | I82.290 | Acute Emblsm & Thrmb, Oth Thoracic Vns | 10 |
| DVT | I82.40 | Acut Embol & Thrombs Uns Deep Vns Lwr | 10 |
| DVT | I82.401 | Acut Embl & Thrmbs Uns Deep Vns Rt Lw | 10 |
| DVT | I82.402 | Acut Embl & Thrmbs Uns Deep Vns Lt Lw | 10 |
| DVT | I82.403 | Acut Embl & Thrmbs Uns Deep Vns Lw, Bi | 10 |
| DVT | I82.409 | Acut Embl & Thrmbs Uns Deep Vns Un Lw | 10 |
| DVT | I82.41 | Acute Emblsm & Thrombosi, Femoral Vein | 10 |
| DVT | I82.411 | Acute Emblsm & Thromb, Rt Femoral Vein | 10 |
| DVT | I82.412 | Acute Emblsm & Thromb, Lt Femoral Vein | 10 |
| DVT | I82.413 | Acute Emblsm & Thrmb, Femoral Vein, Bil | 10 |
| DVT | I82.419 | Acute Emblsm & Thromb, Uns Femoral Vn | 10 |
| DVT | I82.42 | Acute Emblsm & Thrombosis, Iliac Vein | 10 |
| DVT | I82.421 | Acute Emblsm & Thrombos, Rt Iliac Vein | 10 |
| DVT | I82.422 | Acute Emblsm & Thrombos, Lt Iliac Vein | 10 |
| DVT | I82.423 | Acute Emblsm & Thrombo, Iliac Vein, Bil | 10 |
| DVT | I82.429 | Acute Emblsm & Thrombo, Uns Iliac Vein | 10 |
| DVT | I82.43 | Acute Emblsm & Thrombo, Popliteal Vein | 10 |
| DVT | I82.431 | Acute Emblsm & Thromb, Rt Popliteal Vn | 10 |
| DVT | I82.432 | Acute Emblsm & Thromb, Lt Popliteal Vn | 10 |
| DVT | I82.433 | Acute Emblsm & Thrmb, Popliteal Vn, Bil | 10 |
| DVT | I82.439 | Acute Emblsm & Thrmb, Uns Popliteal Vn | 10 |
| DVT | I82.44 | Acute Emblsm & Thrombosi, Tibial Vein | 10 |
| DVT | I82.441 | Acute Emblsm & Thrombo, Rt Tibial Vein | 10 |
| DVT | I82.442 | Acute Emblsm & Thrombo, Lt Tibial Vein | 10 |
| DVT | I82.443 | Acute Emblsm & Thromb, Tibial Vein, Bil | 10 |
| DVT | I82.449 | Acute Emblsm & Thromb, Uns Tibial Vein | 10 |
| DVT | I82.49 | Acut Thromb Oth Sp Deep Vn Lwr Extm | 10 |
| DVT | I82.491 | Acut Thrmb Oth Sp Deep Vn Rt Lwr Ex | 10 |
| DVT | I82.492 | Acut Thrmb Oth Sp Deep Vn Lt Lwr Ex | 10 |
| DVT | I82.493 | Acut Thrmb Oth Sp Deep Vn Lwr, Bil | 10 |
| DVT | I82.499 | Acut Thrmb Oth Sp Deep Vn Uns Lwr E | 10 |
| DVT | I82.4Y | Acut Thromb Unsp Deep Vn Prxml Lwr | 10 |
| DVT | I82.4Y1 | Acut Thrmb Unsp Deep Vn Rt Prxml Lw | 10 |
| DVT | I82.4Y2 | Acut Thrmb Unsp Deep Vn Lt Prxml Lw | 10 |
| DVT | I82.4Y3 | Acut Thrmb Unsp Deep Vn Prxm Lw Bil | 10 |
| DVT | I82.4Y9 | Acut Thrmb Unsp Deep Vn Uns Prxm Lw | 10 |
| DVT | I82.4Z | Acut Thromb Unsp Deep Vn Distal Lwr | 10 |
| DVT | I82.4Z1 | Acut Thrmb Unsp Deep Vn Rt Distl Lw | 10 |
| DVT | I82.4Z2 | Acut Thrmb Unsp Deep Vn Lt Distl Lw | 10 |
| DVT | I82.4Z3 | Acut Thrmb Unsp Deep Vn Dstl Lw, Bil | 10 |
| DVT | I82.4Z9 | Acut Thrmb Unsp Deep Vn Uns Dstl Lw | 10 |
| DVT | I82.60 | Acute Emblsm & Thrmb, Uns Vns, Uppr Ext | 10 |
| DVT | I82.601 | Acute Thrombosi, Uns Vns, Rt Uppr Ext | 10 |
| DVT | I82.602 | Acute Thrombosi, Uns Vns, Lt Uppr Ext | 10 |
| DVT | I82.603 | Acute Thrombosi, Uns Vns, Upr Ext, Bil | 10 |
| DVT | I82.609 | Acute Thrombosi, Uns Vns, Uns Upr Ext | 10 |
| DVT | I82.61 | Acute Thrombosis, Sprfcl Vn, Uppr Ext | 10 |
| DVT | I82.611 | Acute Thrombos, Sprfcl Vn, Rt Upr Ext | 10 |
| DVT | I82.612 | Acute Thrombos, Sprfcl Vn, Lt Upr Ext | 10 |
| DVT | I82.613 | Acute Thrombo, Sprfcl Vn, Upr Ext, Bil | 10 |
| DVT | I82.619 | Acute Thrombo, Sprfcl Vn, Uns Upr Ext | 10 |
| DVT | I82.62 | Acute Emblsm & Thrmb, Deep Vns, Upr Ext | 10 |
| DVT | I82.621 | Acute Thrombosi, Deep Vns, Rt Upr Ext | 10 |
| DVT | I82.622 | Acute Thrombosi, Deep Vns, Lt Upr Ext | 10 |
| DVT | I82.623 | Acute Thrombos, Deep Vns, Upr Ext, Bil | 10 |
| DVT | I82.629 | Acute Thrombos, Deep Vns, Uns Upr Ext | 10 |
| DVT | I82.81 | Emblsm Thrmb, Sprfcl Veins, Lwr Extrm | 10 |
| DVT | I82.811 | Embo Throm, Sprfcl Veins, Rt Lwr Ext | 10 |
| DVT | I82.812 | Embo Throm, Sprfcl Veins, Lt Lwr Ext | 10 |
| DVT | I82.813 | Embolsm, Suprfcl Veins, Lwr Extrm, Bil | 10 |
| DVT | I82.819 | Embol Throm, Sprfcl Veins, Un Lwr Ext | 10 |
| DVT | I82.890 | Acute Emblsm Thrmb, Oth Spcfd Veins | 10 |
| DVT | I82.9 | Embolism & Thrombosis of Unspec Vein | 10 |
| DVT | I82.90 | Acute Emblsm & Thrombosis of Uns Vein | 10 |
| DVT | I82.A1 | Acute Emblsm & Thrmb of Axillary Vein | 10 |
| DVT | I82.A11 | Acute Emblsm & Thrmb, Rt Axillary Vein | 10 |
| DVT | I82.A12 | Acute Emblsm & Thrmb, Lt Axillary Vein | 10 |
| DVT | I82.A13 | Acute Emblsm & Thrmb, Axillary Vn, Bil | 10 |
| DVT | I82.A19 | Acute Emblsm & Thrmb, Uns Axillary Vn | 10 |
| DVT | I82.B1 | Acute Emblsm & Thrmb, Subclavian Vein | 10 |
| DVT | I82.B11 | Acute Emblsm & Thrmb, Rt Subclavn Vein | 10 |
| DVT | I82.B12 | Acute Emblsm & Thrmb, Lt Subclavn Vein | 10 |
| DVT | I82.B13 | Acute Emblsm & Thrmb, Subclavn Vn, Bil | 10 |
| DVT | I82.B19 | Acute Emblsm & Thrmb, Uns Subclavn Vn | 10 |
| DVT | I82.C1 | Acute Emblsm & Thrmb, Intrnl Juglr Vn | 10 |
| DVT | I82.C11 | Acute Emblsm & Thrmb, Rt Int Juglur Vn | 10 |
| DVT | I82.C12 | Acute Emblsm & Thrmb, Lt Int Jugulr Vn | 10 |
| DVT | I82.C13 | Acute Emblsm & Thrmb, Int Juglr Vn, Bil | 10 |
| DVT | I82.C19 | Acute Emblsm & Thrmb, Uns Int Juglr Vn | 10 |
| PE | 415.1 | Pulmon Embolism/Infarct | 9 |
| PE | 415.11 | Embolism/Infrct, Iatrogenic Plmy | 9 |
| PE | 415.13 | Saddle Embolus Pulmonary Artery | 9 |
| PE | 415.19 | Embolism/Infarction, Pulmonary NEC | 9 |
| PE | I26.92 | Saddl Embls Pulm Art w/o Act Cor Pu | 10 |
| PE | I26.99 | Oth Pulmon Emb w/o Acute Cor Pulmon | 10 |
| PE | T82.817A | Embol D/T Cardc Pros Dev, Imp/Grf, Ie | 10 |
| PE | T82.818A | Embol D/T Vascl Pros Dev, Imp/Grf, Ie | 10 |

**Supplementary Table 4. Diagnosis/Procedure Codes for Bleeding**

| **Bleed Type** | **Code** | **Description** | **Code Type** | **ICD Version** |
| --- | --- | --- | --- | --- |
| GI | 456.0 | Varices, Esophageal w/Bleeding | ICD Diagnosis | 9 |
| GI | 456.20 | Varices, Esoph in Dis Ce w/Bleeding | ICD Diagnosis | 9 |
| GI | 530.21 | Ulcer, Esophagus w/Bleeding | ICD Diagnosis | 9 |
| GI | 530.7 | Mallory-Weiss Syndrome | ICD Diagnosis | 9 |
| GI | 530.82 | Hemorrhage, Esophageal | ICD Diagnosis | 9 |
| GI | 531.0 | Ac Stomach Ulcer W Hem* | ICD Diagnosis | 9 |
| GI | 531.00 | Ulcer, Acute Gastric w/Hem w/o Obst | ICD Diagnosis | 9 |
| GI | 531.01 | Ulcer, Acute Gastric w/Hem + Obst | ICD Diagnosis | 9 |
| GI | 531.2 | Ac Stomac Ulc W Hem/Perf | ICD Diagnosis | 9 |
| GI | 531.20 | Ulcer Acute Gastric w/Hem+Prf -Obst | ICD Diagnosis | 9 |
| GI | 531.21 | Ulcer Acute Gastric w/Hem+Prf+Obst | ICD Diagnosis | 9 |
| GI | 531.4 | Chr Stomach Ulc W Hem* | ICD Diagnosis | 9 |
| GI | 531.40 | Ulcer, Chrn Gstrc w/Hem w/o Obst | ICD Diagnosis | 9 |
| GI | 531.41 | Ulcer, Chrn Gastric w/Hem+Obst | ICD Diagnosis | 9 |
| GI | 531.6 | Chr Stomach Ulc Hem/Perf | ICD Diagnosis | 9 |
| GI | 531.60 | Ulcer, Chrn Gastric w/Hem+Prf -Obst | ICD Diagnosis | 9 |
| GI | 531.61 | Ulcer, Chrn Gastric w/Hem+Prf +Obst | ICD Diagnosis | 9 |
| GI | 532.0 | Ac Duodenal Ulcer W Hem* | ICD Diagnosis | 9 |
| GI | 532.00 | Ulcer, Acute Duod w/Hem w/o Obst | ICD Diagnosis | 9 |
| GI | 532.01 | Ulcer, Acute Duod w/Hem w/obst | ICD Diagnosis | 9 |
| GI | 532.2 | Ac Duoden Ulc W Hem/Perf | ICD Diagnosis | 9 |
| GI | 532.20 | Ulcer, Acute Duod w/Hem+Prf -Obst | ICD Diagnosis | 9 |
| GI | 532.21 | Ulcer, Acute Duod w/Hem+Prf +Obst | ICD Diagnosis | 9 |
| GI | 532.4 | Chr Duoden Ulcer W Hem* | ICD Diagnosis | 9 |
| GI | 532.40 | Ulcer, Chrn Duodenal w/Hem w/o Obst | ICD Diagnosis | 9 |
| GI | 532.41 | Ulcer, Chrn Duodenal w/Hem w/obst | ICD Diagnosis | 9 |
| GI | 532.6 | Chr Duoden Ulc Hem/Perf* | ICD Diagnosis | 9 |
| GI | 532.60 | Ulcer, Chrn Duod w/Hem+Prf w/o Obst | ICD Diagnosis | 9 |
| GI | 532.61 | Ulcer, Chrn Duod w/Hem+Prf w/obst | ICD Diagnosis | 9 |
| GI | 533.0 | Ac Peptic Ulcer W Hemorr | ICD Diagnosis | 9 |
| GI | 533.00 | Ulcer, Acute Peptic w/Hem w/o Obst | ICD Diagnosis | 9 |
| GI | 533.01 | Ulcer, Acute Peptic w/Hem w/obst | ICD Diagnosis | 9 |
| GI | 533.2 | Ac Peptic Ulc W Hem/Perf | ICD Diagnosis | 9 |
| GI | 533.20 | Ulcer, Acute Peptic w/Hem+Prf -Obst | ICD Diagnosis | 9 |
| GI | 533.21 | Ulcer, Acute Peptic w/Hem+Prf +Obst | ICD Diagnosis | 9 |
| GI | 533.4 | Chr Peptic Ulcer W Hem* | ICD Diagnosis | 9 |
| GI | 533.40 | Ulcer, Chrn Peptic w/Hem w/o Obst | ICD Diagnosis | 9 |
| GI | 533.41 | Ulcer, Chrn Peptic w/Hem w/obst | ICD Diagnosis | 9 |
| GI | 533.6 | Chr Pept Ulc W Hem/Perf* | ICD Diagnosis | 9 |
| GI | 533.60 | Ulcer, Chrn Peptic w/Hem+Prf -Obst | ICD Diagnosis | 9 |
| GI | 533.61 | Ulcer, Chrn Peptic w/Hem+Prf +Obst | ICD Diagnosis | 9 |
| GI | 534.0 | Ac Marginal Ulcer W Hem* | ICD Diagnosis | 9 |
| GI | 534.00 | Ulcer, Acute Gstroj w/Hem w/o Obst | ICD Diagnosis | 9 |
| GI | 534.01 | Ulcer, Acute Gstroj w/Hem w/obst | ICD Diagnosis | 9 |
| GI | 534.2 | Ac Margin Ulc W Hem/Perf | ICD Diagnosis | 9 |
| GI | 534.20 | Ulcer, Acute Gstroj w/Hem+Prf -Obst | ICD Diagnosis | 9 |
| GI | 534.21 | Ulcer, Acute Gstroj w/Hem+Prf +Obst | ICD Diagnosis | 9 |
| GI | 534.4 | Chr Marginal Ulcer W Hem | ICD Diagnosis | 9 |
| GI | 534.40 | Ulcer, Chrn Gstroj w/Hem w/o Obst | ICD Diagnosis | 9 |
| GI | 534.41 | Ulcer, Chrn Gstroj w/Hem w/obst | ICD Diagnosis | 9 |
| GI | 534.6 | Chr Margin Ulc Hem/Perf* | ICD Diagnosis | 9 |
| GI | 534.60 | Ulcer, Chrn Gstroj w/Hem+Prf -Obst | ICD Diagnosis | 9 |
| GI | 534.61 | Ulcer, Chrn Gstroj w/Hem+Prf +Obst | ICD Diagnosis | 9 |
| GI | 535.01 | Gastritis, Acute w/Hemorrhage | ICD Diagnosis | 9 |
| GI | 535.11 | Gastritis, Atrophic w/Hemorrhage | ICD Diagnosis | 9 |
| GI | 535.21 | Hypertrophy, Gstrc Mucosal w/Hem | ICD Diagnosis | 9 |
| GI | 535.31 | Gastritis, Alcoholic w/Hemorrhage | ICD Diagnosis | 9 |
| GI | 535.41 | Gastritis NEC w/Hemorrhage | ICD Diagnosis | 9 |
| GI | 535.51 | Gastritis NOS w/Hemorrhage | ICD Diagnosis | 9 |
| GI | 535.61 | Duodenitis w/Hemorrhage | ICD Diagnosis | 9 |
| GI | 535.71 | Eosinophil Gastritis w/ Hemorrhage | ICD Diagnosis | 9 |
| GI | 537.83 | Angiodysplasia, Upper Gi w/Hem | ICD Diagnosis | 9 |
| GI | 537.84 | Dieulafoy Lesion, Stomach/Duodenum | ICD Diagnosis | 9 |
| GI | 562.02 | Diverticulosis, Sml Intest w/Hem | ICD Diagnosis | 9 |
| GI | 562.03 | Diverticulitis, Sml Intest w/Hem | ICD Diagnosis | 9 |
| GI | 562.12 | Diverticulosis, Colon w/Hem | ICD Diagnosis | 9 |
| GI | 562.13 | Diverticulitis, Colon w/Hem | ICD Diagnosis | 9 |
| GI | 568.81 | Hemoperitoneum | ICD Diagnosis | 9 |
| GI | 569.3 | Hemorrhage, Rectal & Anal | ICD Diagnosis | 9 |
| GI | 569.85 | Angiodysplasia, Intestine w/Hem | ICD Diagnosis | 9 |
| GI | 569.86 | Dieulafoy Lesion, Intestine | ICD Diagnosis | 9 |
| GI | 578 | Gastrointestinal Hemorr* | ICD Diagnosis | 9 |
| GI | 578.0 | Hematemesis | ICD Diagnosis | 9 |
| GI | 578.1 | Blood in Stool | ICD Diagnosis | 9 |
| GI | 578.9 | Hemorrhage, Gastrointestinal NOS | ICD Diagnosis | 9 |
| GI | I85.01 | Esophageal Varices with Bleeding | ICD Diagnosis | 10 |
| GI | I85.11 | Secondary Esophageal Varices with Bleeding | ICD Diagnosis | 10 |
| GI | K22.11 | Ulcer of Esophagus with Bleeding | ICD Diagnosis | 10 |
| GI | K22.6 | Gastro-Esophageal Laceration-Hemorrhage Syndrome | ICD Diagnosis | 10 |
| GI | K22.8 | Other Specified Diseases of Esophagus | ICD Diagnosis | 10 |
| GI | K25.0 | Acute Gastric Ulcer with Hemorrhage | ICD Diagnosis | 10 |
| GI | K25.2 | Acute Gastric Ulcer with Both Hemorrhage and Perforation | ICD Diagnosis | 10 |
| GI | K25.4 | Chronic or Unspecified Gastric Ulcer with Hemorrhage | ICD Diagnosis | 10 |
| GI | K25.6 | Chronic or Unspecified Gastric Ulcer with Both Hemorrhage and Perforation | ICD Diagnosis | 10 |
| GI | K26.0 | Acute Duodenal Ulcer with Hemorrhage | ICD Diagnosis | 10 |
| GI | K26.2 | Acute Duodenal Ulcer with Both Hemorrhage and Perforation | ICD Diagnosis | 10 |
| GI | K26.4 | Chronic or Unspecified Duodenal Ulcer with Hemorrhage | ICD Diagnosis | 10 |
| GI | K26.6 | Chronic or Unspecified Duodenal Ulcer with Both Hemorrhage and Perforation | ICD Diagnosis | 10 |
| GI | K27.0 | Acute Peptic Ulcer, Site Unspecified, with Hemorrhage | ICD Diagnosis | 10 |
| GI | K27.2 | Acute Peptic Ulcer, Site Unspecified, with Both Hemorrhage and Perforation | ICD Diagnosis | 10 |
| GI | K27.4 | Chronic or Unspecified Peptic Ulcer, Site Unspecified, with Hemorrhage | ICD Diagnosis | 10 |
| GI | K27.6 | Chronic or Unspecified Peptic Ulcer, Site Unspecified, with Both Hemorrhage and Perforation | ICD Diagnosis | 10 |
| GI | K28.0 | Acute Gastrojejunal Ulcer with Hemorrhage | ICD Diagnosis | 10 |
| GI | K28.2 | Acute Gastrojejunal Ulcer with Both Hemorrhage and Perforation | ICD Diagnosis | 10 |
| GI | K28.4 | Chronic or Unspecified Gastrojejunal Ulcer with Hemorrhage | ICD Diagnosis | 10 |
| GI | K28.6 | Chronic or Unspecified Gastrojejunal Ulcer with Both Hemorrhage and Perforation | ICD Diagnosis | 10 |
| GI | K29.01 | Acute Gastritis with Bleeding | ICD Diagnosis | 10 |
| GI | K29.21 | Alcoholic Gastritis with Bleeding | ICD Diagnosis | 10 |
| GI | K29.31 | Chronic Superficial Gastritis with Bleeding | ICD Diagnosis | 10 |
| GI | K29.41 | Chronic Atrophic Gastritis with Bleeding | ICD Diagnosis | 10 |
| GI | K29.51 | Unspecified Chronic Gastritis with Bleeding | ICD Diagnosis | 10 |
| GI | K29.61 | Other Gastritis with Bleeding | ICD Diagnosis | 10 |
| GI | K29.71 | Gastritis, Unspecified, with Bleeding | ICD Diagnosis | 10 |
| GI | K29.81 | Duodenitis with Bleeding | ICD Diagnosis | 10 |
| GI | K29.91 | Gastroduodenitis, Unspecified, with Bleeding | ICD Diagnosis | 10 |
| GI | K31.811 | Angiodysplasia of Stomach and Duodenum with Bleeding | ICD Diagnosis | 10 |
| GI | K31.82 | Dieulafoy Lesion (Hemorrhagic) of Stomach and Duodenum | ICD Diagnosis | 10 |
| GI | K52.81 | Eosinophilic Gastritis or Gastroenteritis | ICD Diagnosis | 10 |
| GI | K55.21 | Angiodysplasia of Colon with Hemorrhage | ICD Diagnosis | 10 |
| GI | K56.60 | Unspecified Intestinal Obstruction | ICD Diagnosis | 10 |
| GI | K57.01 | Diverticulitis of Small Intestine with Perforation and Abscess with Bleeding | ICD Diagnosis | 10 |
| GI | K57.11 | Diverticulosis of Small Intestine without Perforation or Abscess with Bleeding | ICD Diagnosis | 10 |
| GI | K57.13 | Diverticulitis of Small Intestine without Perforation or Abscess with Bleeding | ICD Diagnosis | 10 |
| GI | K57.21 | Diverticulitis of Large Intestine with Perforation and Abscess with Bleeding | ICD Diagnosis | 10 |
| GI | K57.31 | Diverticulosis of Large Intestine without Perforation or Abscess with Bleeding | ICD Diagnosis | 10 |
| GI | K57.33 | Diverticulitis of Large Intestine without Perforation or Abscess with Bleeding | ICD Diagnosis | 10 |
| GI | K57.41 | Diverticulitis of Both Small and Large Intestine with Perforation and Abscess with Bleeding | ICD Diagnosis | 10 |
| GI | K57.51 | Diverticulosis of Both Small and Large Intestine without Perforation or Abscess with Bleeding | ICD Diagnosis | 10 |
| GI | K57.53 | Diverticulitis of Both Small and Large Intestine without Perforation or Abscess with Bleeding | ICD Diagnosis | 10 |
| GI | K57.81 | Diverticulitis of Intestine, Part Unspecified, with Perforation and Abscess with Bleeding | ICD Diagnosis | 10 |
| GI | K57.91 | Diverticulosis of Intestine, Part Unspecified, without Perforation or Abscess with Bleeding | ICD Diagnosis | 10 |
| GI | K57.93 | Diverticulitis of Intestine, Part Unspecified, without Perforation or Abscess with Bleeding | ICD Diagnosis | 10 |
| GI | K62.5 | Hemorrhage of Anus and Rectum | ICD Diagnosis | 10 |
| GI | K63.81 | Dieulafoy Lesion of Intestine | ICD Diagnosis | 10 |
| GI | K66.1 | Hemoperitoneum | ICD Diagnosis | 10 |
| GI | K92.0 | Hematemesis | ICD Diagnosis | 10 |
| GI | K92.1 | Melena | ICD Diagnosis | 10 |
| GI | K92.2 | Gastrointestinal Hemorrhage, Unspecified | ICD Diagnosis | 10 |
| GI | 44.43 | Gastric Bleeding Endoscopic Control | ICD Procedure | 9 |
| GI | 0W3P8ZZ | Control Bleeding in Gastrointestinal Tract, Endo | ICD Procedure | 10 |
| Intracranial | 430 | Hemorrhage, Subarachnoid | ICD Diagnosis | 9 |
| Intracranial | 431 | Hemorrhage, Intracerebral | ICD Diagnosis | 9 |
| Intracranial | 432 | Intracranial Hem NEC/NOS | ICD Diagnosis | 9 |
| Intracranial | 432.0 | Hemorrhage, Nontraumatic Extradural | ICD Diagnosis | 9 |
| Intracranial | 432.1 | Hemorrhage, Subdural | ICD Diagnosis | 9 |
| Intracranial | 432.9 | Hemorrhage, Intracranial NOS | ICD Diagnosis | 9 |
| Intracranial | 852.0 | Traum Subarachnoid Hem* | ICD Diagnosis | 9 |
| Intracranial | 852.00 | Hem Subarac w/o Opn Wnd, Unspc Loc | ICD Diagnosis | 9 |
| Intracranial | 852.01 | Hem Subarac w/o Opn Wnd, No Loc | ICD Diagnosis | 9 |
| Intracranial | 852.02 | Hem Subarac w/o Opn Wnd, <1H Loc | ICD Diagnosis | 9 |
| Intracranial | 852.03 | Hem Subarac w/o Opn Wnd, 1-24H Loc | ICD Diagnosis | 9 |
| Intracranial | 852.04 | Hem Subarac w/o Opn Wnd >24Loc +Rpc | ICD Diagnosis | 9 |
| Intracranial | 852.05 | Hem Subarac w/o Opn Wnd >24Loc -Rpc | ICD Diagnosis | 9 |
| Intracranial | 852.06 | Hem Subarac w/o Opn Wnd, NOS Loc | ICD Diagnosis | 9 |
| Intracranial | 852.09 | Hem Subarac w/o Opn Wnd, Cncus NOS | ICD Diagnosis | 9 |
| Intracranial | 852.2 | Traumatic Subdural Hem* | ICD Diagnosis | 9 |
| Intracranial | 852.20 | Hem Sbdrl w/o Opn Wnd, Unspc Loc | ICD Diagnosis | 9 |
| Intracranial | 852.21 | Hem Sbdrl w/o Opn Wnd, No Loc | ICD Diagnosis | 9 |
| Intracranial | 852.22 | Hem Sbdrl w/o Opn Wnd, <1H Loc | ICD Diagnosis | 9 |
| Intracranial | 852.23 | Hem Sbdrl w/o Opn Wnd, 1-24H Loc | ICD Diagnosis | 9 |
| Intracranial | 852.24 | Hem Sbdrl w/o Opn Wnd, >24 Loc +Rpc | ICD Diagnosis | 9 |
| Intracranial | 852.25 | Hem Sbdrl w/o Opn Wnd, >24 Loc -Rpc | ICD Diagnosis | 9 |
| Intracranial | 852.26 | Hem Sbdrl w/o Opn Wnd, NOS Loc | ICD Diagnosis | 9 |
| Intracranial | 852.29 | Hem Sbdrl w/o Opn Wnd, Cncus NOS | ICD Diagnosis | 9 |
| Intracranial | 852.4 | Traumatic Extradural Hem | ICD Diagnosis | 9 |
| Intracranial | 852.40 | Hem Extdr w/o Opn Wnd, Unspc Loc | ICD Diagnosis | 9 |
| Intracranial | 852.41 | Hem Extdr w/o Opn Wnd, No Loc | ICD Diagnosis | 9 |
| Intracranial | 852.42 | Hem Extdr w/o Opn Wnd, <1H Loc | ICD Diagnosis | 9 |
| Intracranial | 852.43 | Hem Extdr w/o Opn Wnd, 1-24H Loc | ICD Diagnosis | 9 |
| Intracranial | 852.44 | Hem Extdr w/o Opn Wnd, >24 Loc +Rpc | ICD Diagnosis | 9 |
| Intracranial | 852.45 | Hem Extdr w/o Opn Wnd, >24 Loc -Rpc | ICD Diagnosis | 9 |
| Intracranial | 852.46 | Hem Extdr w/o Opn Wnd, NOS Loc | ICD Diagnosis | 9 |
| Intracranial | 852.49 | Hem Extdr w/o Opn Wnd, Cncus NOS | ICD Diagnosis | 9 |
| Intracranial | 853.0 | Traumatic Brain Hem NEC* | ICD Diagnosis | 9 |
| Intracranial | 853.00 | Hem Brain NEC w/o Opn Wnd Unspc Loc | ICD Diagnosis | 9 |
| Intracranial | 853.01 | Hem Brain NEC w/o Opn Wnd No Loc | ICD Diagnosis | 9 |
| Intracranial | 853.02 | Hem Brain NEC w/o Opn Wnd, <1H Loc | ICD Diagnosis | 9 |
| Intracranial | 853.03 | Hem Brain NEC w/o Opn Wnd 1-24H Loc | ICD Diagnosis | 9 |
| Intracranial | 853.04 | Hem Brn NEC w/o Opn Wnd >24Loc +Rpc | ICD Diagnosis | 9 |
| Intracranial | 853.05 | Hem Brn NEC w/o Opn Wnd >24Loc -Rpc | ICD Diagnosis | 9 |
| Intracranial | 853.06 | Hem Brain NEC w/o Opn Wnd, NOS Loc | ICD Diagnosis | 9 |
| Intracranial | 853.09 | Hem Brain NEC w/o Opn Wnd Cncus NOS | ICD Diagnosis | 9 |
| Intracranial | I60.00 | Nontraumatic Subarachnoid Hemorrhage from Unspecified Carotid Siphon and Bifurcation | ICD Diagnosis | 10 |
| Intracranial | I60.01 | Nontraumatic Subarachnoid Hemorrhage from Right Carotid Siphon and Bifurcation | ICD Diagnosis | 10 |
| Intracranial | I60.02 | Nontraumatic Subarachnoid Hemorrhage from Left Carotid Siphon and Bifurcation | ICD Diagnosis | 10 |
| Intracranial | I60.10 | Nontraumatic Subarachnoid Hemorrhage from Unspecified Middle Cerebral Artery | ICD Diagnosis | 10 |
| Intracranial | I60.11 | Nontraumatic Subarachnoid Hemorrhage from Right Middle Cerebral Artery | ICD Diagnosis | 10 |
| Intracranial | I60.12 | Nontraumatic Subarachnoid Hemorrhage from Left Middle Cerebral Artery | ICD Diagnosis | 10 |
| Intracranial | I60.2 | Nontraumatic Subarachnoid Hemorrhage from Anterior Communicating Artery | ICD Diagnosis | 10 |
| Intracranial | I60.30 | Nontraumatic Subarachnoid Hemorrhage from Unspecified Posterior Communicating Artery | ICD Diagnosis | 10 |
| Intracranial | I60.31 | Nontraumatic Subarachnoid Hemorrhage from Right Posterior Communicating Artery | ICD Diagnosis | 10 |
| Intracranial | I60.32 | Nontraumatic Subarachnoid Hemorrhage from Left Posterior Communicating Artery | ICD Diagnosis | 10 |
| Intracranial | I60.4 | Nontraumatic Subarachnoid Hemorrhage from Basilar Artery | ICD Diagnosis | 10 |
| Intracranial | I60.50 | Nontraumatic Subarachnoid Hemorrhage from Unspecified Vertebral Artery | ICD Diagnosis | 10 |
| Intracranial | I60.51 | Nontraumatic Subarachnoid Hemorrhage from Right Vertebral Artery | ICD Diagnosis | 10 |
| Intracranial | I60.52 | Nontraumatic Subarachnoid Hemorrhage from Left Vertebral Artery | ICD Diagnosis | 10 |
| Intracranial | I60.6 | Nontraumatic Subarachnoid Hemorrhage from Other Intracranial Arteries | ICD Diagnosis | 10 |
| Intracranial | I60.7 | Nontraumatic Subarachnoid Hemorrhage from Unspecified Intracranial Artery | ICD Diagnosis | 10 |
| Intracranial | I60.8 | Other Nontraumatic Subarachnoid Hemorrhage | ICD Diagnosis | 10 |
| Intracranial | I60.9 | Nontraumatic Subarachnoid Hemorrhage, Unspecified | ICD Diagnosis | 10 |
| Intracranial | I61.0 | Nontraumatic Intracerebral Hemorrhage in Hemisphere, Subcortical | ICD Diagnosis | 10 |
| Intracranial | I61.1 | Nontraumatic Intracerebral Hemorrhage in Hemisphere, Cortical | ICD Diagnosis | 10 |
| Intracranial | I61.2 | Nontraumatic Intracerebral Hemorrhage in Hemisphere, Unspecified | ICD Diagnosis | 10 |
| Intracranial | I61.3 | Nontraumatic Intracerebral Hemorrhage in Brain Stem | ICD Diagnosis | 10 |
| Intracranial | I61.4 | Nontraumatic Intracerebral Hemorrhage in Cerebellum | ICD Diagnosis | 10 |
| Intracranial | I61.5 | Nontraumatic Intracerebral Hemorrhage, Intraventricular | ICD Diagnosis | 10 |
| Intracranial | I61.6 | Nontraumatic Intracerebral Hemorrhage, Multiple Localized | ICD Diagnosis | 10 |
| Intracranial | I61.8 | Other Nontraumatic Intracerebral Hemorrhage | ICD Diagnosis | 10 |
| Intracranial | I61.9 | Nontraumatic Intracerebral Hemorrhage, Unspecified | ICD Diagnosis | 10 |
| Intracranial | I62.00 | Nontraumatic Subdural Hemorrhage, Unspecified | ICD Diagnosis | 10 |
| Intracranial | I62.01 | Nontraumatic Acute Subdural Hemorrhage | ICD Diagnosis | 10 |
| Intracranial | I62.02 | Nontraumatic Subacute Subdural Hemorrhage | ICD Diagnosis | 10 |
| Intracranial | I62.03 | Nontraumatic Chronic Subdural Hemorrhage | ICD Diagnosis | 10 |
| Intracranial | I62.1 | Nontraumatic Extradural Hemorrhage | ICD Diagnosis | 10 |
| Intracranial | I62.9 | Nontraumatic Intracranial Hemorrhage, Unspecified | ICD Diagnosis | 10 |
| Intracranial | S06.340A | Traumatic Hemorrhage of Right Cerebrum without Loss of Consciousness, Initial Encounter | ICD Diagnosis | 10 |
| Intracranial | S06.341A | Traumatic Hemorrhage of Right Cerebrum with Loss of Consciousness of 30 Minutes or Less, Initial Encounter | ICD Diagnosis | 10 |
| Intracranial | S06.342A | Traumatic Hemorrhage of Right Cerebrum with Loss of Consciousness of 31 Minutes to 59 Minutes, Initial Encounter | ICD Diagnosis | 10 |
| Intracranial | S06.343A | Traumatic Hemorrhage of Right Cerebrum with Loss of Consciousness of 1 Hours to 5 Hours 59 Minutes, Initial Encounter | ICD Diagnosis | 10 |
| Intracranial | S06.344A | Traumatic Hemorrhage of Right Cerebrum with Loss of Consciousness of 6 Hours to 24 Hours, Initial Encounter | ICD Diagnosis | 10 |
| Intracranial | S06.345A | Traumatic Hemorrhage of Right Cerebrum with Loss of Consciousness Greater than 24 Hours with Return to Pre-Existing Conscious Level, Initial Encounter | ICD Diagnosis | 10 |
| Intracranial | S06.346A | Traumatic Hemorrhage of Right Cerebrum with Loss of Consciousness Greater than 24 Hours without Return to Pre-Existing Conscious Level with Patient Surviving, Initial Encounter | ICD Diagnosis | 10 |
| Intracranial | S06.347A | Traumatic Hemorrhage of Right Cerebrum with Loss of Consciousness of Any Duration with Death Due to Brain Injury Prior to Regaining Consciousness, Initial Encounter | ICD Diagnosis | 10 |
| Intracranial | S06.348A | Traumatic Hemorrhage of Right Cerebrum with Loss of Consciousness of Any Duration with Death Due to Other Cause Prior to Regaining Consciousness, Initial Encounter | ICD Diagnosis | 10 |
| Intracranial | S06.349A | Traumatic Hemorrhage of Right Cerebrum with Loss of Consciousness of Unspecified Duration, Initial Encounter | ICD Diagnosis | 10 |
| Intracranial | S06.350A | Traumatic Hemorrhage of Left Cerebrum without Loss of Consciousness, Initial Encounter | ICD Diagnosis | 10 |
| Intracranial | S06.351A | Traumatic Hemorrhage of Left Cerebrum with Loss of Consciousness of 30 Minutes or Less, Initial Encounter | ICD Diagnosis | 10 |
| Intracranial | S06.352A | Traumatic Hemorrhage of Left Cerebrum with Loss of Consciousness of 31 Minutes to 59 Minutes, Initial Encounter | ICD Diagnosis | 10 |
| Intracranial | S06.353A | Traumatic Hemorrhage of Left Cerebrum with Loss of Consciousness of 1 Hours to 5 Hours 59 Minutes, Initial Encounter | ICD Diagnosis | 10 |
| Intracranial | S06.354A | Traumatic Hemorrhage of Left Cerebrum with Loss of Consciousness of 6 Hours to 24 Hours, Initial Encounter | ICD Diagnosis | 10 |
| Intracranial | S06.355A | Traumatic Hemorrhage of Left Cerebrum with Loss of Consciousness Greater than 24 Hours with Return to Pre-Existing Conscious Level, Initial Encounter | ICD Diagnosis | 10 |
| Intracranial | S06.356A | Traumatic Hemorrhage of Left Cerebrum with Loss of Consciousness Greater than 24 Hours without Return to Pre-Existing Conscious Level with Patient Surviving, Initial Encounter | ICD Diagnosis | 10 |
| Intracranial | S06.357A | Traumatic Hemorrhage of Left Cerebrum with Loss of Consciousness of Any Duration with Death Due to Brain Injury Prior to Regaining Consciousness, Initial Encounter | ICD Diagnosis | 10 |
| Intracranial | S06.358A | Traumatic Hemorrhage of Left Cerebrum with Loss of Consciousness of Any Duration with Death Due to Other Cause Prior to Regaining Consciousness, Initial Encounter | ICD Diagnosis | 10 |
| Intracranial | S06.359A | Traumatic Hemorrhage of Left Cerebrum with Loss of Consciousness of Unspecified Duration, Initial Encounter | ICD Diagnosis | 10 |
| Intracranial | S06.360A | Traumatic Hemorrhage of Cerebrum, Unspecified, without Loss of Consciousness, Initial Encounter | ICD Diagnosis | 10 |
| Intracranial | S06.361A | Traumatic Hemorrhage of Cerebrum, Unspecified, with Loss of Consciousness of 30 Minutes or Less, Initial Encounter | ICD Diagnosis | 10 |
| Intracranial | S06.362A | Traumatic Hemorrhage of Cerebrum, Unspecified, with Loss of Consciousness of 31 Minutes to 59 Minutes, Initial Encounter | ICD Diagnosis | 10 |
| Intracranial | S06.363A | Traumatic Hemorrhage of Cerebrum, Unspecified, with Loss of Consciousness of 1 Hours to 5 Hours 59 Minutes, Initial Encounter | ICD Diagnosis | 10 |
| Intracranial | S06.364A | Traumatic Hemorrhage of Cerebrum, Unspecified, with Loss of Consciousness of 6 Hours to 24 Hours, Initial Encounter | ICD Diagnosis | 10 |
| Intracranial | S06.365A | Traumatic Hemorrhage of Cerebrum, Unspecified, with Loss of Consciousness Greater than 24 Hours with Return to Pre-Existing Conscious Level, Initial Encounter | ICD Diagnosis | 10 |
| Intracranial | S06.366A | Traumatic Hemorrhage of Cerebrum, Unspecified, with Loss of Consciousness Greater than 24 Hours without Return to Pre-Existing Conscious Level with Patient Surviving, Initial Encounter | ICD Diagnosis | 10 |
| Intracranial | S06.367A | Traumatic Hemorrhage of Cerebrum, Unspecified, with Loss of Consciousness of Any Duration with Death Due to Brain Injury Prior to Regaining Consciousness, Initial Encounter | ICD Diagnosis | 10 |
| Intracranial | S06.368A | Traumatic Hemorrhage of Cerebrum, Unspecified, with Loss of Consciousness of Any Duration with Death Due to Other Cause Prior to Regaining Consciousness, Initial Encounter | ICD Diagnosis | 10 |
| Intracranial | S06.369A | Traumatic Hemorrhage of Cerebrum, Unspecified, with Loss of Consciousness of Unspecified Duration, Initial Encounter | ICD Diagnosis | 10 |
| Intracranial | S06.4X0A | Epidural Hemorrhage without Loss of Consciousness, Initial Encounter | ICD Diagnosis | 10 |
| Intracranial | S06.4X1A | Epidural Hemorrhage with Loss of Consciousness of 30 Minutes or Less, Initial Encounter | ICD Diagnosis | 10 |
| Intracranial | S06.4X2A | Epidural Hemorrhage with Loss of Consciousness of 31 Minutes to 59 Minutes, Initial Encounter | ICD Diagnosis | 10 |
| Intracranial | S06.4X3A | Epidural Hemorrhage with Loss of Consciousness of 1 Hour to 5 Hours 59 Minutes, Initial Encounter | ICD Diagnosis | 10 |
| Intracranial | S06.4X4A | Epidural Hemorrhage with Loss of Consciousness of 6 Hours to 24 Hours, Initial Encounter | ICD Diagnosis | 10 |
| Intracranial | S06.4X5A | Epidural Hemorrhage with Loss of Consciousness Greater than 24 Hours with Return to Pre-Existing Conscious Level, Initial Encounter | ICD Diagnosis | 10 |
| Intracranial | S06.4X6A | Epidural Hemorrhage with Loss of Consciousness Greater than 24 Hours without Return to Pre-Existing Conscious Level with Patient Surviving, Initial Encounter | ICD Diagnosis | 10 |
| Intracranial | S06.4X7A | Epidural Hemorrhage with Loss of Consciousness of Any Duration with Death Due to Brain Injury Prior to Regaining Consciousness, Initial Encounter | ICD Diagnosis | 10 |
| Intracranial | S06.4X8A | Epidural Hemorrhage with Loss of Consciousness of Any Duration with Death Due to Other Causes Prior to Regaining Consciousness, Initial Encounter | ICD Diagnosis | 10 |
| Intracranial | S06.4X9A | Epidural Hemorrhage with Loss of Consciousness of Unspecified Duration, Initial Encounter | ICD Diagnosis | 10 |
| Intracranial | S06.5X0A | Traumatic Subdural Hemorrhage without Loss of Consciousness, Initial Encounter | ICD Diagnosis | 10 |
| Intracranial | S06.5X1A | Traumatic Subdural Hemorrhage with Loss of Consciousness of 30 Minutes or Less, Initial Encounter | ICD Diagnosis | 10 |
| Intracranial | S06.5X2A | Traumatic Subdural Hemorrhage with Loss of Consciousness of 31 Minutes to 59 Minutes, Initial Encounter | ICD Diagnosis | 10 |
| Intracranial | S06.5X3A | Traumatic Subdural Hemorrhage with Loss of Consciousness of 1 Hour to 5 Hours 59 Minutes, Initial Encounter | ICD Diagnosis | 10 |
| Intracranial | S06.5X4A | Traumatic Subdural Hemorrhage with Loss of Consciousness of 6 Hours to 24 Hours, Initial Encounter | ICD Diagnosis | 10 |
| Intracranial | S06.5X5A | Traumatic Subdural Hemorrhage with Loss of Consciousness Greater than 24 Hours with Return to Pre-Existing Conscious Level, Initial Encounter | ICD Diagnosis | 10 |
| Intracranial | S06.5X6A | Traumatic Subdural Hemorrhage with Loss of Consciousness Greater than 24 Hours without Return to Pre-Existing Conscious Level with Patient Surviving, Initial Encounter | ICD Diagnosis | 10 |
| Intracranial | S06.5X7A | Traumatic Subdural Hemorrhage with Loss of Consciousness of Any Duration with Death Due to Brain Injury Before Regaining Consciousness, Initial Encounter | ICD Diagnosis | 10 |
| Intracranial | S06.5X8A | Traumatic Subdural Hemorrhage with Loss of Consciousness of Any Duration with Death Due to Other Cause Before Regaining Consciousness, Initial Encounter | ICD Diagnosis | 10 |
| Intracranial | S06.5X9A | Traumatic Subdural Hemorrhage with Loss of Consciousness of Unspecified Duration, Initial Encounter | ICD Diagnosis | 10 |
| Intracranial | S06.6X0A | Traumatic Subarachnoid Hemorrhage without Loss of Consciousness, Initial Encounter | ICD Diagnosis | 10 |
| Intracranial | S06.6X1A | Traumatic Subarachnoid Hemorrhage with Loss of Consciousness of 30 Minutes or Less, Initial Encounter | ICD Diagnosis | 10 |
| Intracranial | S06.6X2A | Traumatic Subarachnoid Hemorrhage with Loss of Consciousness of 31 Minutes to 59 Minutes, Initial Encounter | ICD Diagnosis | 10 |
| Intracranial | S06.6X3A | Traumatic Subarachnoid Hemorrhage with Loss of Consciousness of 1 Hour to 5 Hours 59 Minutes, Initial Encounter | ICD Diagnosis | 10 |
| Intracranial | S06.6X4A | Traumatic Subarachnoid Hemorrhage with Loss of Consciousness of 6 Hours to 24 Hours, Initial Encounter | ICD Diagnosis | 10 |
| Intracranial | S06.6X5A | Traumatic Subarachnoid Hemorrhage with Loss of Consciousness Greater than 24 Hours with Return to Pre-Existing Conscious Level, Initial Encounter | ICD Diagnosis | 10 |
| Intracranial | S06.6X6A | Traumatic Subarachnoid Hemorrhage with Loss of Consciousness Greater than 24 Hours without Return to Pre-Existing Conscious Level with Patient Surviving, Initial Encounter | ICD Diagnosis | 10 |
| Intracranial | S06.6X7A | Traumatic Subarachnoid Hemorrhage with Loss of Consciousness of Any Duration with Death Due to Brain Injury Prior to Regaining Consciousness, Initial Encounter | ICD Diagnosis | 10 |
| Intracranial | S06.6X8A | Traumatic Subarachnoid Hemorrhage with Loss of Consciousness of Any Duration with Death Due to Other Cause Prior to Regaining Consciousness, Initial Encounter | ICD Diagnosis | 10 |
| Intracranial | S06.6X9A | Traumatic Subarachnoid Hemorrhage with Loss of Consciousness of Unspecified Duration, Initial Encounter | ICD Diagnosis | 10 |
| Other | 285.1 | Anemia, Acute Posthemorrhagic | ICD Diagnosis | 9 |
| Other | 360.43 | Hemophthalmos | ICD Diagnosis | 9 |
| Other | 362.43 | Dtchmt, Hem, Rtnl Pigment Epith | ICD Diagnosis | 9 |
| Other | 362.81 | Hemorrhage, Retinal | ICD Diagnosis | 9 |
| Other | 363.61 | Hemorrhage, Choroidal NOS | ICD Diagnosis | 9 |
| Other | 363.62 | Hemorrhage, Expulsive Choroidal | ICD Diagnosis | 9 |
| Other | 363.72 | Detachment, Hemorrhagic Choroidal | ICD Diagnosis | 9 |
| Other | 364.41 | Hyphema | ICD Diagnosis | 9 |
| Other | 372.72 | Hemorrhage, Conjunctival | ICD Diagnosis | 9 |
| Other | 374.81 | Hemorrhage, Eyelid | ICD Diagnosis | 9 |
| Other | 376.32 | Hemorrhage, Orbital | ICD Diagnosis | 9 |
| Other | 377.42 | Hemorrhage in Optic Nerve Sheath | ICD Diagnosis | 9 |
| Other | 379.23 | Hemorrhage, Vitreous | ICD Diagnosis | 9 |
| Other | 423.0 | Hemopericardium | ICD Diagnosis | 9 |
| Other | 459.0 | Hemorrhage NOS | ICD Diagnosis | 9 |
| Other | 596.7 | Hemorrhage Into Bladder Wall | ICD Diagnosis | 9 |
| Other | 599.7 | Hematuria | ICD Diagnosis | 9 |
| Other | 599.70 | Hematuria, Unspecified | ICD Diagnosis | 9 |
| Other | 599.71 | Gross Hematuria | ICD Diagnosis | 9 |
| Other | 599.72 | Microscopic Hematuria | ICD Diagnosis | 9 |
| Other | 602.1 | Congestion/Hemorrhage, Prostate | ICD Diagnosis | 9 |
| Other | 620.1 | Cyst, Corpus Luteum | ICD Diagnosis | 9 |
| Other | 621.4 | Hematometra | ICD Diagnosis | 9 |
| Other | 626.2 | Excessive Menstruation | ICD Diagnosis | 9 |
| Other | 626.5 | Bleeding, Ovulation | ICD Diagnosis | 9 |
| Other | 626.7 | Bleeding, Postcoital | ICD Diagnosis | 9 |
| Other | 626.8 | Disorder, Menstrual NEC | ICD Diagnosis | 9 |
| Other | 626.9 | Disorder, Menstrual NOS | ICD Diagnosis | 9 |
| Other | 719.1 | Hemarthrosis* | ICD Diagnosis | 9 |
| Other | 719.10 | Hemarthrosis, Unspecified Site | ICD Diagnosis | 9 |
| Other | 719.11 | Hemarthrosis, Shoulder | ICD Diagnosis | 9 |
| Other | 719.12 | Hemarthrosis, Upper Arm | ICD Diagnosis | 9 |
| Other | 719.13 | Hemarthrosis, Forearm | ICD Diagnosis | 9 |
| Other | 719.14 | Hemarthrosis, Hand | ICD Diagnosis | 9 |
| Other | 719.15 | Hemarthrosis, Pelvis/Thigh | ICD Diagnosis | 9 |
| Other | 719.16 | Hemarthrosis, Lower Leg | ICD Diagnosis | 9 |
| Other | 719.17 | Hemarthrosis, Ankle/Foot | ICD Diagnosis | 9 |
| Other | 719.18 | Hemarthrosis, Other Spec Site | ICD Diagnosis | 9 |
| Other | 719.19 | Hemarthrosis, Multiple Sites | ICD Diagnosis | 9 |
| Other | 782.7 | Symp Ecchymoses, Spontaneous | ICD Diagnosis | 9 |
| Other | 784.7 | Symptom, Epistaxis | ICD Diagnosis | 9 |
| Other | 784.8 | Symptom, Hemorrhage from Throat | ICD Diagnosis | 9 |
| Other | 786.3 | Symptom, Hemoptysis | ICD Diagnosis | 9 |
| Other | 786.30 | Symptom, Hemoptysis, Unsp | ICD Diagnosis | 9 |
| Other | 786.31 | Symptom, Acute Idiopath Pulm Hemor | ICD Diagnosis | 9 |
| Other | 786.39 | Symptom, Other Hemoptysis | ICD Diagnosis | 9 |
| Other | 958.2 | Hemorrhage, Secondary/Recurrent | ICD Diagnosis | 9 |
| Other | 997.02 | Infarction/Hem, Iatrogenic Cerbvas | ICD Diagnosis | 9 |
| Other | 998.11 | Hemorrhage Complicating A Procedure | ICD Diagnosis | 9 |
| Other | D62 | Acute Posthemorrhagic Anemia | ICD Diagnosis | 10 |
| Other | D78.01 | Intraoperative Hemorrhage and Hematoma of The Spleen Complicating A Procedure On The Spleen | ICD Diagnosis | 10 |
| Other | D78.02 | Intraoperative Hemorrhage and Hematoma of The Spleen Complicating Other Procedure | ICD Diagnosis | 10 |
| Other | D78.21 | Postprocedural Hemorrhage of The Spleen Following A Procedure On The Spleen | ICD Diagnosis | 10 |
| Other | D78.22 | Postprocedural Hemorrhage of The Spleen Following Other Procedure | ICD Diagnosis | 10 |
| Other | E36.01 | Intraoperative Hemorrhage and Hematoma of an Endocrine System Organ or Structure Complicating An Endocrine System Procedure | ICD Diagnosis | 10 |
| Other | E36.02 | Intraoperative Hemorrhage and Hematoma of an Endocrine System Organ or Structure Complicating Other Procedure | ICD Diagnosis | 10 |
| Other | E89.810 | Postprocedural Hemorrhage of an Endocrine System Organ or Structure Following An Endocrine System Procedure | ICD Diagnosis | 10 |
| Other | E89.811 | Postprocedural Hemorrhage of an Endocrine System Organ or Structure Following Other Procedure | ICD Diagnosis | 10 |
| Other | G97.31 | Intraoperative Hemorrhage and Hematoma of a Nervous System Organ or Structure Complicating A Nervous System Procedure | ICD Diagnosis | 10 |
| Other | G97.32 | Intraoperative Hemorrhage and Hematoma of a Nervous System Organ or Structure Complicating Other Procedure | ICD Diagnosis | 10 |
| Other | G97.51 | Postprocedural Hemorrhage of a Nervous System Organ or Structure Following A Nervous System Procedure | ICD Diagnosis | 10 |
| Other | G97.52 | Postprocedural Hemorrhage of a Nervous System Organ or Structure Following Other Procedure | ICD Diagnosis | 10 |
| Other | H02.89 | Other Specified Disorders of Eyelid | ICD Diagnosis | 10 |
| Other | H05.231 | Hemorrhage of Right Orbit | ICD Diagnosis | 10 |
| Other | H05.232 | Hemorrhage of Left Orbit | ICD Diagnosis | 10 |
| Other | H05.233 | Hemorrhage of Bilateral Orbit | ICD Diagnosis | 10 |
| Other | H05.239 | Hemorrhage of Unspecified Orbit | ICD Diagnosis | 10 |
| Other | H11.30 | Conjunctival Hemorrhage, Unspecified Eye | ICD Diagnosis | 10 |
| Other | H11.31 | Conjunctival Hemorrhage, Right Eye | ICD Diagnosis | 10 |
| Other | H11.32 | Conjunctival Hemorrhage, Left Eye | ICD Diagnosis | 10 |
| Other | H11.33 | Conjunctival Hemorrhage, Bilateral | ICD Diagnosis | 10 |
| Other | H21.00 | Hyphema, Unspecified Eye | ICD Diagnosis | 10 |
| Other | H21.01 | Hyphema, Right Eye | ICD Diagnosis | 10 |
| Other | H21.02 | Hyphema, Left Eye | ICD Diagnosis | 10 |
| Other | H21.03 | Hyphema, Bilateral | ICD Diagnosis | 10 |
| Other | H31.301 | Unspecified Choroidal Hemorrhage, Right Eye | ICD Diagnosis | 10 |
| Other | H31.302 | Unspecified Choroidal Hemorrhage, Left Eye | ICD Diagnosis | 10 |
| Other | H31.303 | Unspecified Choroidal Hemorrhage, Bilateral | ICD Diagnosis | 10 |
| Other | H31.309 | Unspecified Choroidal Hemorrhage, Unspecified Eye | ICD Diagnosis | 10 |
| Other | H31.311 | Expulsive Choroidal Hemorrhage, Right Eye | ICD Diagnosis | 10 |
| Other | H31.312 | Expulsive Choroidal Hemorrhage, Left Eye | ICD Diagnosis | 10 |
| Other | H31.313 | Expulsive Choroidal Hemorrhage, Bilateral | ICD Diagnosis | 10 |
| Other | H31.319 | Expulsive Choroidal Hemorrhage, Unspecified Eye | ICD Diagnosis | 10 |
| Other | H31.411 | Hemorrhagic Choroidal Detachment, Right Eye | ICD Diagnosis | 10 |
| Other | H31.412 | Hemorrhagic Choroidal Detachment, Left Eye | ICD Diagnosis | 10 |
| Other | H31.413 | Hemorrhagic Choroidal Detachment, Bilateral | ICD Diagnosis | 10 |
| Other | H31.419 | Hemorrhagic Choroidal Detachment, Unspecified Eye | ICD Diagnosis | 10 |
| Other | H35.60 | Retinal Hemorrhage, Unspecified Eye | ICD Diagnosis | 10 |
| Other | H35.61 | Retinal Hemorrhage, Right Eye | ICD Diagnosis | 10 |
| Other | H35.62 | Retinal Hemorrhage, Left Eye | ICD Diagnosis | 10 |
| Other | H35.63 | Retinal Hemorrhage, Bilateral | ICD Diagnosis | 10 |
| Other | H35.731 | Hemorrhagic Detachment of Retinal Pigment Epithelium, Right Eye | ICD Diagnosis | 10 |
| Other | H35.732 | Hemorrhagic Detachment of Retinal Pigment Epithelium, Left Eye | ICD Diagnosis | 10 |
| Other | H35.733 | Hemorrhagic Detachment of Retinal Pigment Epithelium, Bilateral | ICD Diagnosis | 10 |
| Other | H35.739 | Hemorrhagic Detachment of Retinal Pigment Epithelium, Unspecified Eye | ICD Diagnosis | 10 |
| Other | H43.10 | Vitreous Hemorrhage, Unspecified Eye | ICD Diagnosis | 10 |
| Other | H43.11 | Vitreous Hemorrhage, Right Eye | ICD Diagnosis | 10 |
| Other | H43.12 | Vitreous Hemorrhage, Left Eye | ICD Diagnosis | 10 |
| Other | H43.13 | Vitreous Hemorrhage, Bilateral | ICD Diagnosis | 10 |
| Other | H44.811 | Hemophthalmos, Right Eye | ICD Diagnosis | 10 |
| Other | H44.812 | Hemophthalmos, Left Eye | ICD Diagnosis | 10 |
| Other | H44.813 | Hemophthalmos, Bilateral | ICD Diagnosis | 10 |
| Other | H44.819 | Hemophthalmos, Unspecified Eye | ICD Diagnosis | 10 |
| Other | H47.021 | Hemorrhage in Optic Nerve Sheath, Right Eye | ICD Diagnosis | 10 |
| Other | H47.022 | Hemorrhage in Optic Nerve Sheath, Left Eye | ICD Diagnosis | 10 |
| Other | H47.023 | Hemorrhage in Optic Nerve Sheath, Bilateral | ICD Diagnosis | 10 |
| Other | H47.029 | Hemorrhage in Optic Nerve Sheath, Unspecified Eye | ICD Diagnosis | 10 |
| Other | H59.111 | Intraoperative Hemorrhage and Hematoma of Right Eye and Adnexa Complicating An Ophthalmic Procedure | ICD Diagnosis | 10 |
| Other | H59.112 | Intraoperative Hemorrhage and Hematoma of Left Eye and Adnexa Complicating An Ophthalmic Procedure | ICD Diagnosis | 10 |
| Other | H59.113 | Intraoperative Hemorrhage and Hematoma of Eye and Adnexa Complicating An Ophthalmic Procedure, Bilateral | ICD Diagnosis | 10 |
| Other | H59.119 | Intraoperative Hemorrhage and Hematoma of Unspecified Eye and Adnexa Complicating An Ophthalmic Procedure | ICD Diagnosis | 10 |
| Other | H59.121 | Intraoperative Hemorrhage and Hematoma of Right Eye and Adnexa Complicating Other Procedure | ICD Diagnosis | 10 |
| Other | H59.122 | Intraoperative Hemorrhage and Hematoma of Left Eye and Adnexa Complicating Other Procedure | ICD Diagnosis | 10 |
| Other | H59.123 | Intraoperative Hemorrhage and Hematoma of Eye and Adnexa Complicating Other Procedure, Bilateral | ICD Diagnosis | 10 |
| Other | H59.129 | Intraoperative Hemorrhage and Hematoma of Unspecified Eye and Adnexa Complicating Other Procedure | ICD Diagnosis | 10 |
| Other | H59.311 | Postprocedural Hemorrhage of Right Eye and Adnexa Following An Ophthalmic Procedure | ICD Diagnosis | 10 |
| Other | H59.312 | Postprocedural Hemorrhage of Left Eye and Adnexa Following An Ophthalmic Procedure | ICD Diagnosis | 10 |
| Other | H59.313 | Postprocedural Hemorrhage of Eye and Adnexa Following An Ophthalmic Procedure, Bilateral | ICD Diagnosis | 10 |
| Other | H59.319 | Postprocedural Hemorrhage of Unspecified Eye and Adnexa Following An Ophthalmic Procedure | ICD Diagnosis | 10 |
| Other | H59.321 | Postprocedural Hemorrhage of Right Eye and Adnexa Following Other Procedure | ICD Diagnosis | 10 |
| Other | H59.322 | Postprocedural Hemorrhage of Left Eye and Adnexa Following Other Procedure | ICD Diagnosis | 10 |
| Other | H59.323 | Postprocedural Hemorrhage of Eye and Adnexa Following Other Procedure, Bilateral | ICD Diagnosis | 10 |
| Other | H59.329 | Postprocedural Hemorrhage of Unspecified Eye and Adnexa Following Other Procedure | ICD Diagnosis | 10 |
| Other | H95.21 | Intraoperative Hemorrhage and Hematoma of Ear and Mastoid Process Complicating A Procedure On The Ear and Mastoid Process | ICD Diagnosis | 10 |
| Other | H95.22 | Intraoperative Hemorrhage and Hematoma of Ear and Mastoid Process Complicating Other Procedure | ICD Diagnosis | 10 |
| Other | H95.41 | Postprocedural Hemorrhage of Ear and Mastoid Process Following A Procedure On The Ear and Mastoid Process | ICD Diagnosis | 10 |
| Other | H95.42 | Postprocedural Hemorrhage of Ear and Mastoid Process Following Other Procedure | ICD Diagnosis | 10 |
| Other | I31.2 | Hemopericardium, Not Elsewhere Classified | ICD Diagnosis | 10 |
| Other | I97.410 | Intraoperative Hemorrhage and Hematoma of a Circulatory System Organ or Structure Complicating A Cardiac Catheterization | ICD Diagnosis | 10 |
| Other | I97.411 | Intraoperative Hemorrhage and Hematoma of a Circulatory System Organ or Structure Complicating A Cardiac Bypass | ICD Diagnosis | 10 |
| Other | I97.418 | Intraoperative Hemorrhage and Hematoma of a Circulatory System Organ or Structure Complicating Other Circulatory System Procedure | ICD Diagnosis | 10 |
| Other | I97.42 | Intraoperative Hemorrhage and Hematoma of a Circulatory System Organ or Structure Complicating Other Procedure | ICD Diagnosis | 10 |
| Other | I97.610 | Postprocedural Hemorrhage of a Circulatory System Organ or Structure Following A Cardiac Catheterization | ICD Diagnosis | 10 |
| Other | I97.611 | Postprocedural Hemorrhage of a Circulatory System Organ or Structure Following Cardiac Bypass | ICD Diagnosis | 10 |
| Other | I97.618 | Postprocedural Hemorrhage of a Circulatory System Organ or Structure Following Other Circulatory System Procedure | ICD Diagnosis | 10 |
| Other | I97.620 | Postprocedural Hemorrhage of a Circulatory System Organ or Structure Following Other Procedure | ICD Diagnosis | 10 |
| Other | I97.810 | Intraoperative Cerebrovascular Infarction During Cardiac Surgery | ICD Diagnosis | 10 |
| Other | I97.811 | Intraoperative Cerebrovascular Infarction During Other Surgery | ICD Diagnosis | 10 |
| Other | I97.820 | Postprocedural Cerebrovascular Infarction Following Cardiac Surgery | ICD Diagnosis | 10 |
| Other | I97.821 | Postprocedural Cerebrovascular Infarction Following Other Surgery | ICD Diagnosis | 10 |
| Other | J95.61 | Intraoperative Hemorrhage and Hematoma of a Respiratory System Organ or Structure Complicating A Respiratory System Procedure | ICD Diagnosis | 10 |
| Other | J95.62 | Intraoperative Hemorrhage and Hematoma of a Respiratory System Organ or Structure Complicating Other Procedure | ICD Diagnosis | 10 |
| Other | J95.830 | Postprocedural Hemorrhage of a Respiratory System Organ or Structure Following A Respiratory System Procedure | ICD Diagnosis | 10 |
| Other | J95.831 | Postprocedural Hemorrhage of a Respiratory System Organ or Structure Following Other Procedure | ICD Diagnosis | 10 |
| Other | K91.61 | Intraoperative Hemorrhage and Hematoma of a Digestive System Organ or Structure Complicating A Digestive System Procedure | ICD Diagnosis | 10 |
| Other | K91.62 | Intraoperative Hemorrhage and Hematoma of a Digestive System Organ or Structure Complicating Other Procedure | ICD Diagnosis | 10 |
| Other | K91.840 | Postprocedural Hemorrhage of a Digestive System Organ or Structure Following A Digestive System Procedure | ICD Diagnosis | 10 |
| Other | K91.841 | Postprocedural Hemorrhage of a Digestive System Organ or Structure Following Other Procedure | ICD Diagnosis | 10 |
| Other | L76.01 | Intraoperative Hemorrhage and Hematoma of Skin and Subcutaneous Tissue Complicating A Dermatologic Procedure | ICD Diagnosis | 10 |
| Other | L76.02 | Intraoperative Hemorrhage and Hematoma of Skin and Subcutaneous Tissue Complicating Other Procedure | ICD Diagnosis | 10 |
| Other | L76.21 | Postprocedural Hemorrhage of Skin and Subcutaneous Tissue Following A Dermatologic Procedure | ICD Diagnosis | 10 |
| Other | L76.22 | Postprocedural Hemorrhage of Skin and Subcutaneous Tissue Following Other Procedure | ICD Diagnosis | 10 |
| Other | M25.00 | Hemarthrosis, Unspecified Joint | ICD Diagnosis | 10 |
| Other | M25.011 | Hemarthrosis, Right Shoulder | ICD Diagnosis | 10 |
| Other | M25.012 | Hemarthrosis, Left Shoulder | ICD Diagnosis | 10 |
| Other | M25.019 | Hemarthrosis, Unspecified Shoulder | ICD Diagnosis | 10 |
| Other | M25.021 | Hemarthrosis, Right Elbow | ICD Diagnosis | 10 |
| Other | M25.022 | Hemarthrosis, Left Elbow | ICD Diagnosis | 10 |
| Other | M25.029 | Hemarthrosis, Unspecified Elbow | ICD Diagnosis | 10 |
| Other | M25.031 | Hemarthrosis, Right Wrist | ICD Diagnosis | 10 |
| Other | M25.032 | Hemarthrosis, Left Wrist | ICD Diagnosis | 10 |
| Other | M25.039 | Hemarthrosis, Unspecified Wrist | ICD Diagnosis | 10 |
| Other | M25.041 | Hemarthrosis, Right Hand | ICD Diagnosis | 10 |
| Other | M25.042 | Hemarthrosis, Left Hand | ICD Diagnosis | 10 |
| Other | M25.049 | Hemarthrosis, Unspecified Hand | ICD Diagnosis | 10 |
| Other | M25.051 | Hemarthrosis, Right Hip | ICD Diagnosis | 10 |
| Other | M25.052 | Hemarthrosis, Left Hip | ICD Diagnosis | 10 |
| Other | M25.059 | Hemarthrosis, Unspecified Hip | ICD Diagnosis | 10 |
| Other | M25.061 | Hemarthrosis, Right Knee | ICD Diagnosis | 10 |
| Other | M25.062 | Hemarthrosis, Left Knee | ICD Diagnosis | 10 |
| Other | M25.069 | Hemarthrosis, Unspecified Knee | ICD Diagnosis | 10 |
| Other | M25.071 | Hemarthrosis, Right Ankle | ICD Diagnosis | 10 |
| Other | M25.072 | Hemarthrosis, Left Ankle | ICD Diagnosis | 10 |
| Other | M25.073 | Hemarthrosis, Unspecified Ankle | ICD Diagnosis | 10 |
| Other | M25.074 | Hemarthrosis, Right Foot | ICD Diagnosis | 10 |
| Other | M25.075 | Hemarthrosis, Left Foot | ICD Diagnosis | 10 |
| Other | M25.076 | Hemarthrosis, Unspecified Foot | ICD Diagnosis | 10 |
| Other | M25.08 | Hemarthrosis, Other Specified Site | ICD Diagnosis | 10 |
| Other | M96.810 | Intraoperative Hemorrhage and Hematoma of a Musculoskeletal Structure Complicating A Musculoskeletal System Procedure | ICD Diagnosis | 10 |
| Other | M96.811 | Intraoperative Hemorrhage and Hematoma of a Musculoskeletal Structure Complicating Other Procedure | ICD Diagnosis | 10 |
| Other | M96.830 | Postprocedural Hemorrhage of a Musculoskeletal Structure Following A Musculoskeletal System Procedure | ICD Diagnosis | 10 |
| Other | M96.831 | Postprocedural Hemorrhage of a Musculoskeletal Structure Following Other Procedure | ICD Diagnosis | 10 |
| Other | N32.89 | Other Specified Disorders of Bladder | ICD Diagnosis | 10 |
| Other | N42.1 | Congestion and Hemorrhage of Prostate | ICD Diagnosis | 10 |
| Other | N83.10 | Corpus Luteum Cyst of Ovary, Unspecified Side | ICD Diagnosis | 10 |
| Other | N83.11 | Corpus Luteum Cyst of Right Ovary | ICD Diagnosis | 10 |
| Other | N83.12 | Corpus Luteum Cyst of Left Ovary | ICD Diagnosis | 10 |
| Other | N85.7 | Hematometra | ICD Diagnosis | 10 |
| Other | N89.7 | Hematocolpos | ICD Diagnosis | 10 |
| Other | N92.0 | Excessive and Frequent Menstruation with Regular Cycle | ICD Diagnosis | 10 |
| Other | N92.3 | Ovulation Bleeding | ICD Diagnosis | 10 |
| Other | N92.5 | Other Specified Irregular Menstruation | ICD Diagnosis | 10 |
| Other | N92.6 | Irregular Menstruation, Unspecified | ICD Diagnosis | 10 |
| Other | N93.0 | Postcoital and Contact Bleeding | ICD Diagnosis | 10 |
| Other | N93.1 | Pre-Pubertal Vaginal Bleeding | ICD Diagnosis | 10 |
| Other | N93.8 | Other Specified Abnormal Uterine and Vaginal Bleeding | ICD Diagnosis | 10 |
| Other | N93.9 | Abnormal Uterine and Vaginal Bleeding, Unspecified | ICD Diagnosis | 10 |
| Other | N99.61 | Intraoperative Hemorrhage and Hematoma of a Genitourinary System Organ or Structure Complicating A Genitourinary System Procedure | ICD Diagnosis | 10 |
| Other | N99.62 | Intraoperative Hemorrhage and Hematoma of a Genitourinary System Organ or Structure Complicating Other Procedure | ICD Diagnosis | 10 |
| Other | N99.820 | Postprocedural Hemorrhage of a Genitourinary System Organ or Structure Following A Genitourinary System Procedure | ICD Diagnosis | 10 |
| Other | N99.821 | Postprocedural Hemorrhage of a Genitourinary System Organ or Structure Following Other Procedure | ICD Diagnosis | 10 |
| Other | R04.0 | Epistaxis | ICD Diagnosis | 10 |
| Other | R04.1 | Hemorrhage from Throat | ICD Diagnosis | 10 |
| Other | R04.2 | Hemoptysis | ICD Diagnosis | 10 |
| Other | R04.81 | Acute Idiopathic Pulmonary Hemorrhage in Infants | ICD Diagnosis | 10 |
| Other | R04.89 | Hemorrhage from Other Sites in Respiratory Passages | ICD Diagnosis | 10 |
| Other | R04.9 | Hemorrhage from Respiratory Passages, Unspecified | ICD Diagnosis | 10 |
| Other | R23.3 | Spontaneous Ecchymoses | ICD Diagnosis | 10 |
| Other | R31.0 | Gross Hematuria | ICD Diagnosis | 10 |
| Other | R31.1 | Benign Essential Microscopic Hematuria | ICD Diagnosis | 10 |
| Other | R31.21 | Asymptomatic Microscopic Hematuria | ICD Diagnosis | 10 |
| Other | R31.29 | Other Microscopic Hematuria | ICD Diagnosis | 10 |
| Other | R31.9 | Hematuria, Unspecified | ICD Diagnosis | 10 |
| Other | R58 | Hemorrhage, Not Elsewhere Classified | ICD Diagnosis | 10 |
| Other | T79.2XXA | Traumatic Secondary and Recurrent Hemorrhage and Seroma, Initial Encounter | ICD Diagnosis | 10 |
| Other | 99.04 | Transfusion of Packed Cells | ICD Procedure | 9 |
| Other | 30230N1 | Transfuse Nonaut Red Blood Cells in Periph Vein, Open | ICD Procedure | 10 |
| Other | 30230P1 | Transfuse Nonaut Frozen Red Cells in Periph Vein, Open | ICD Procedure | 10 |
| Other | 30233N1 | Transfuse Nonaut Red Blood Cells in Periph Vein, Perc | ICD Procedure | 10 |
| Other | 30233P1 | Transfuse Nonaut Frozen Red Cells in Periph Vein, Perc | ICD Procedure | 10 |
| Other | 30240N1 | Transfuse Nonaut Red Blood Cells in Central Vein, Open | ICD Procedure | 10 |
| Other | 30240P1 | Transfuse Nonaut Frozen Red Cells in Central Vein, Open | ICD Procedure | 10 |
| Other | 30243N1 | Transfuse Nonaut Red Blood Cells in Central Vein, Perc | ICD Procedure | 10 |
| Other | 30243P1 | Transfuse Nonaut Frozen Red Cells in Central Vein, Perc | ICD Procedure | 10 |
| Other | 30250N1 | Transfuse Nonaut Red Blood Cells in Periph Art, Open | ICD Procedure | 10 |
| Other | 30250P1 | Transfuse Nonaut Frozen Red Cells in Periph Art, Open | ICD Procedure | 10 |
| Other | 30253N1 | Transfuse Nonaut Red Blood Cells in Periph Art, Perc | ICD Procedure | 10 |
| Other | 30253P1 | Transfuse Nonaut Frozen Red Cells in Periph Art, Perc | ICD Procedure | 10 |
| Other | 30260N1 | Transfuse Nonaut Red Blood Cells in Central Art, Open | ICD Procedure | 10 |
| Other | 30260P1 | Transfuse Nonaut Frozen Red Cells in Central Art, Open | ICD Procedure | 10 |
| Other | 30263N1 | Transfuse Nonaut Red Blood Cells in Central Art, Perc | ICD Procedure | 10 |
| Other | 30263P1 | Transfuse Nonaut Frozen Red Cells in Central Art, Perc | ICD Procedure | 10 |
